# Supplementary material for: Synthesis, Characterization, Cytotoxicity Analysis and Evaluation of Novel Heterocyclic Derivatives of Benzamidine against Periodontal Disease Triggering Bacteria
Source: MDPI journal article supplement (doi:10.3390/antibiotics12020306), 2023-02-02
Supplement: s1 [file s1]

# **Synthesis, Characterization, Cytotoxicity Analysis and Evaluation of Novel Heterocyclic Derivatives of Benзамidine against Periodontal Disease Triggering Bacteria**

**Ramasamy Kavitha <sup>1</sup>, Mohammad Auwal Sa'ad <sup>1,2</sup>, Shivkanya Fuloria <sup>3</sup>, Neeraj Kumar Fuloria <sup>3,4,\*</sup>, Manickam Ravichandran <sup>1,2,5,\*</sup> and Pattabhiraman Lalitha <sup>6</sup>**

<sup>1</sup> Department of Biotechnology, Faculty of Applied Science, AIMST University, Bedong 08100, Kedah, Malaysia

<sup>2</sup> Centre of Excellence for Vaccine Development (CoEVD), Faculty of Applied Science, AIMST University, Bedong 08100, Kedah, Malaysia

<sup>3</sup> Centre of Excellence for Biomaterials Engineering, Faculty of Pharmacy, AIMST University, Bedong 08100, Kedah, Malaysia

<sup>4</sup> Center for Transdisciplinary Research, Department of Pharmacology, Saveetha Institute of Medical and Technical Sciences, Saveetha Dental College and Hospital, Saveetha University, Chennai 600077, Tamil Nadu, India

<sup>5</sup> Mygenome, ALPS Global Holding, Kuala Lumpur 50400, Malaysia

<sup>6</sup> Department of Biochemistry, Faculty of Medicine, AIMST University, Bedong 08100, Kedah, Malaysia

\* Correspondence: neerajkumar@aimst.edu.my (N.K.F.); ravichandran@aimst.edu.my (M.R.)

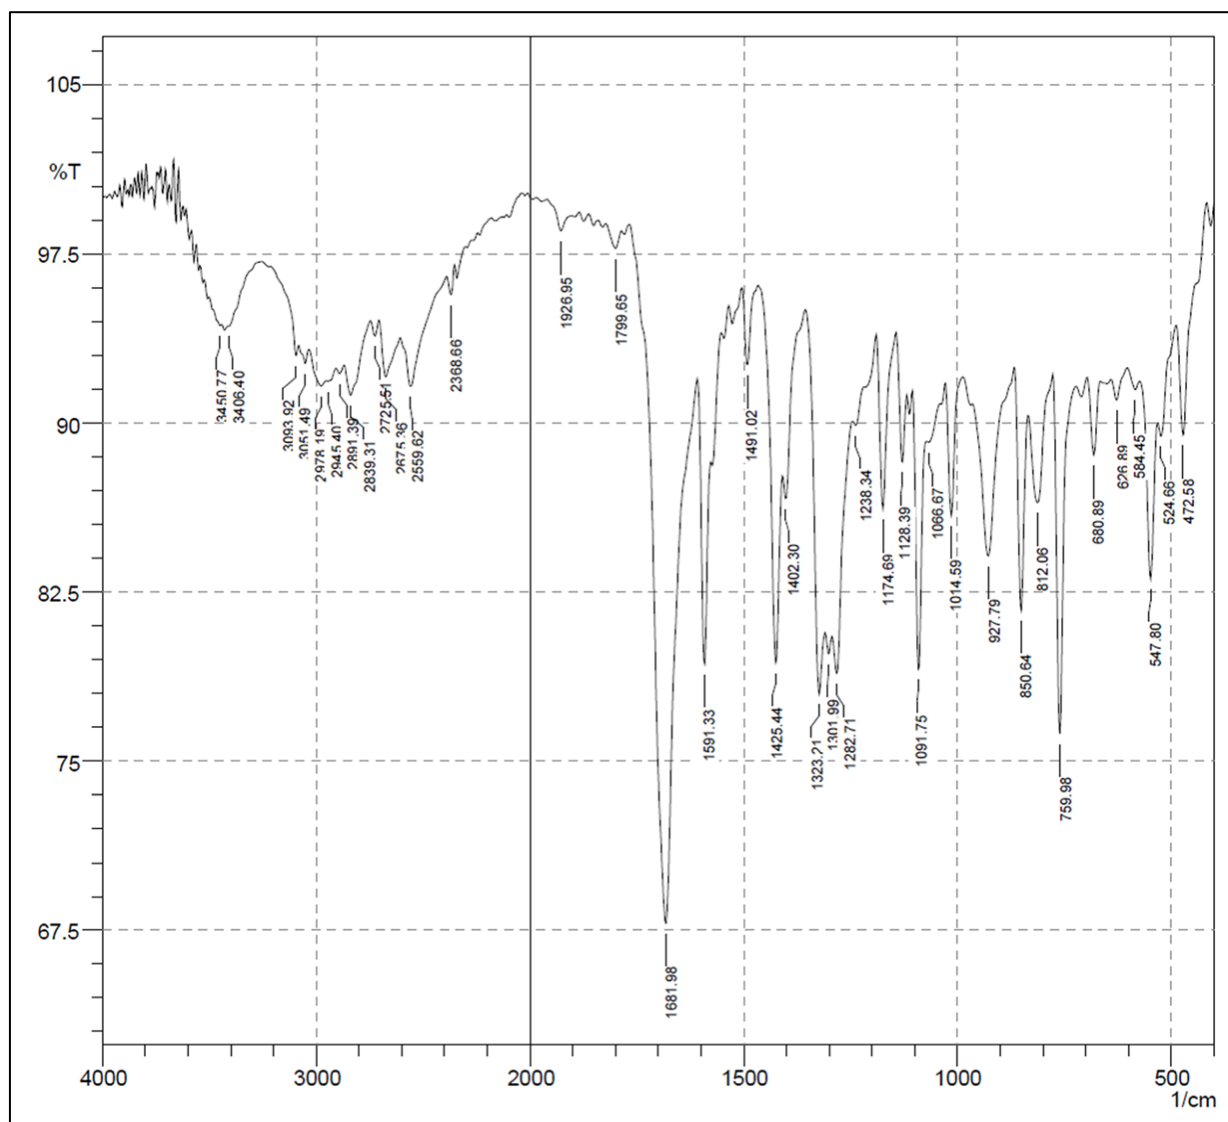

Figure S1. FTIR spectrum of compound 5a

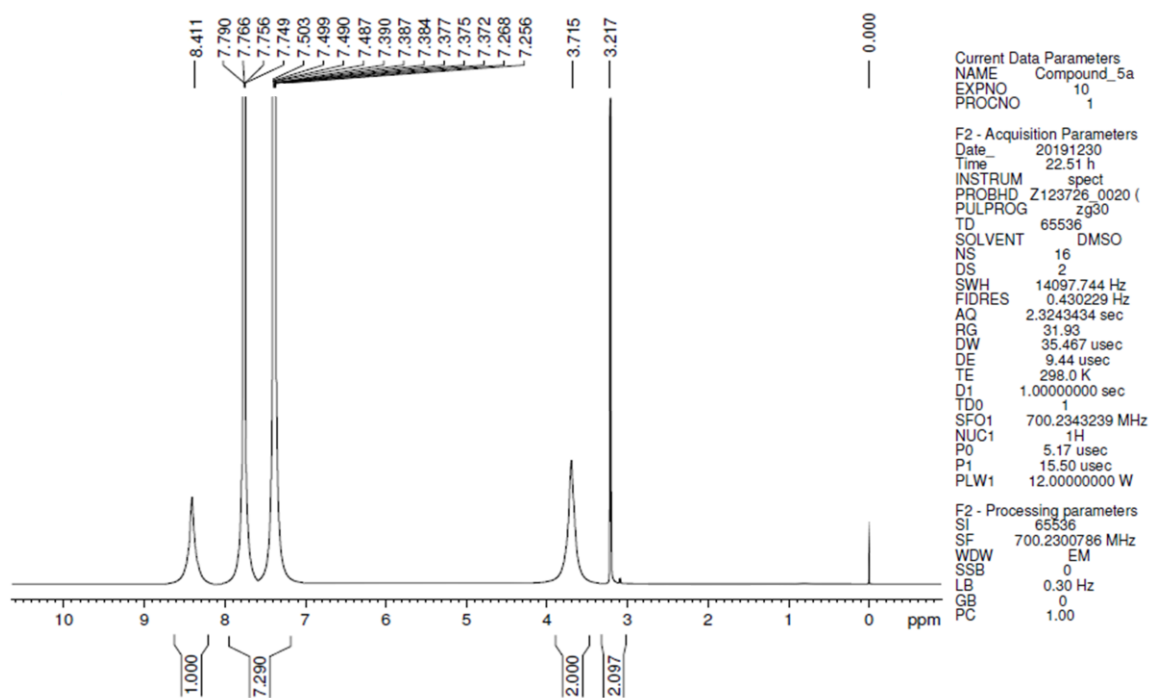

Figure S2.  $^1\text{H}$ -NMR spectrum of compound 5a

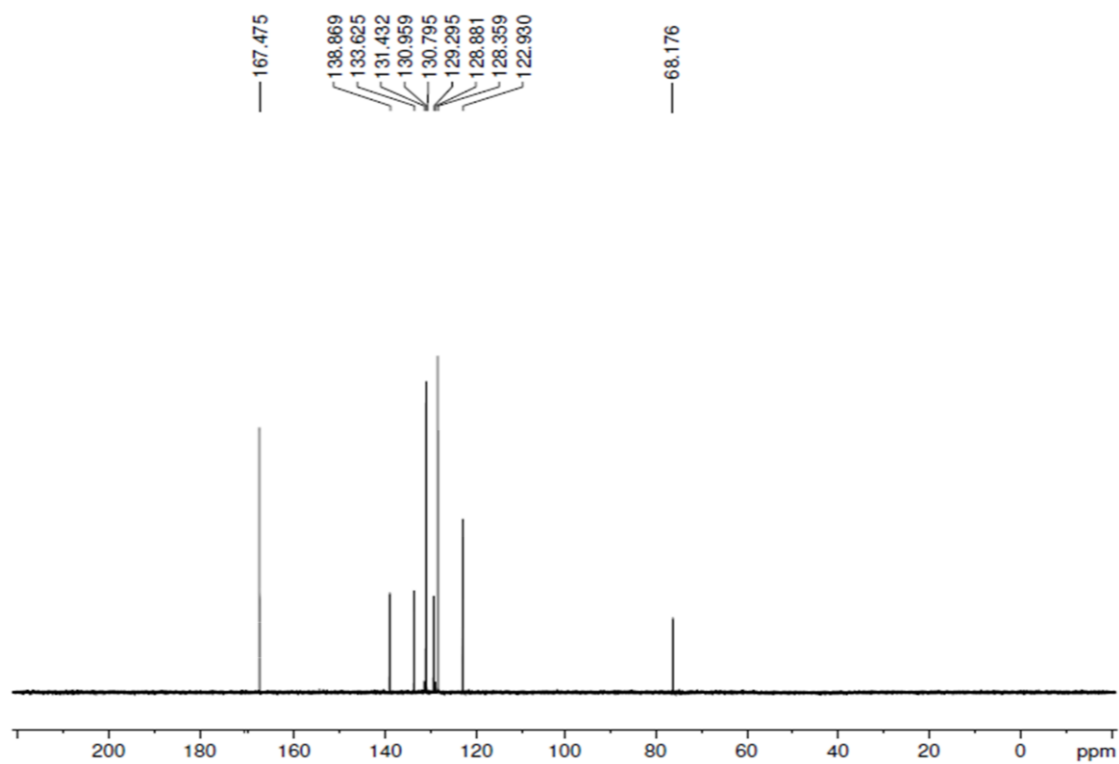

Figure S3.  $^{13}\text{C}$ -NMR spectrum of compound 5a

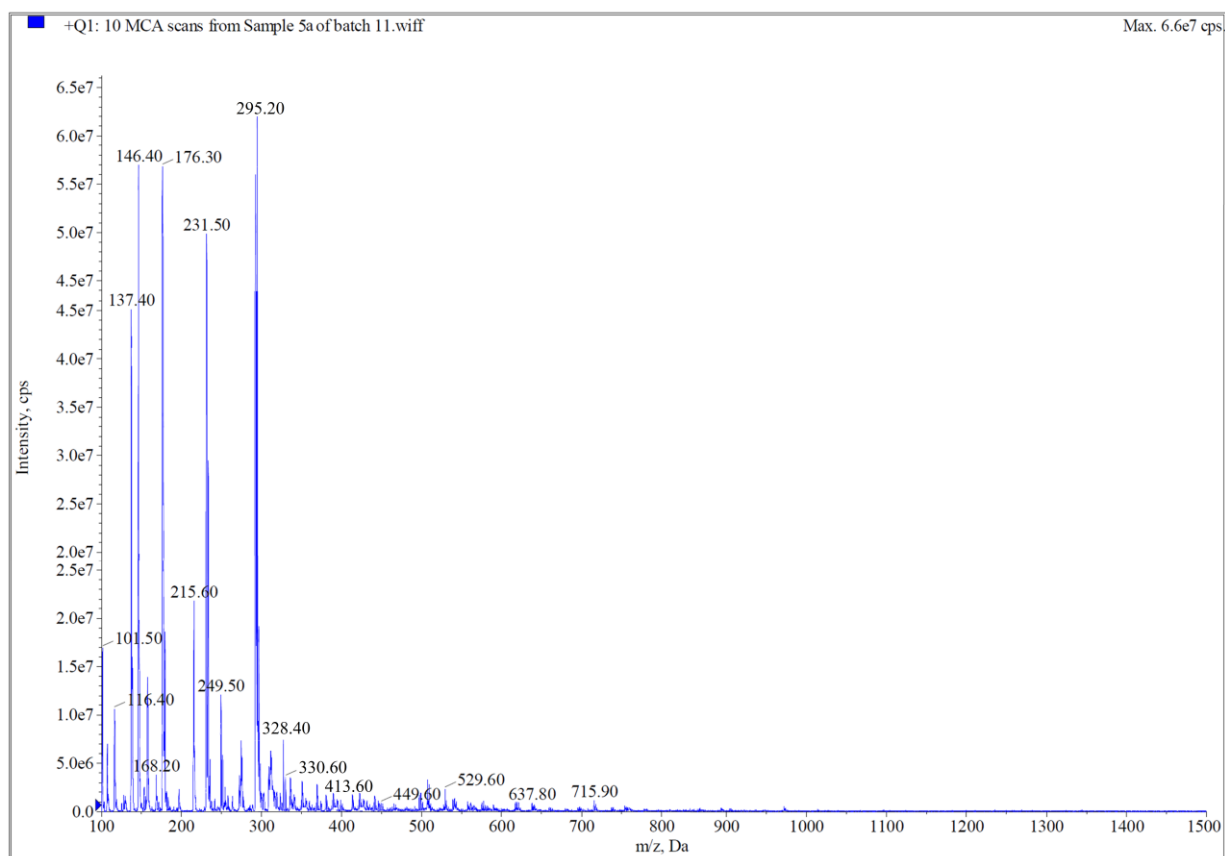

**Figure S4.** MASS spectrum of compound 5a

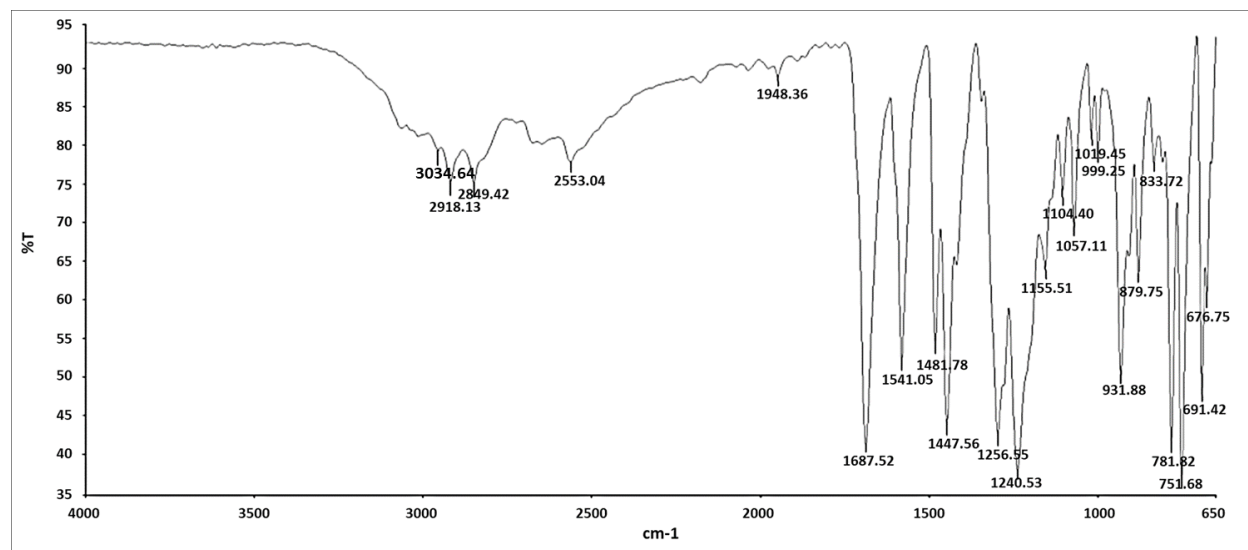

Figure S5. FTIR spectrum of compound 6a

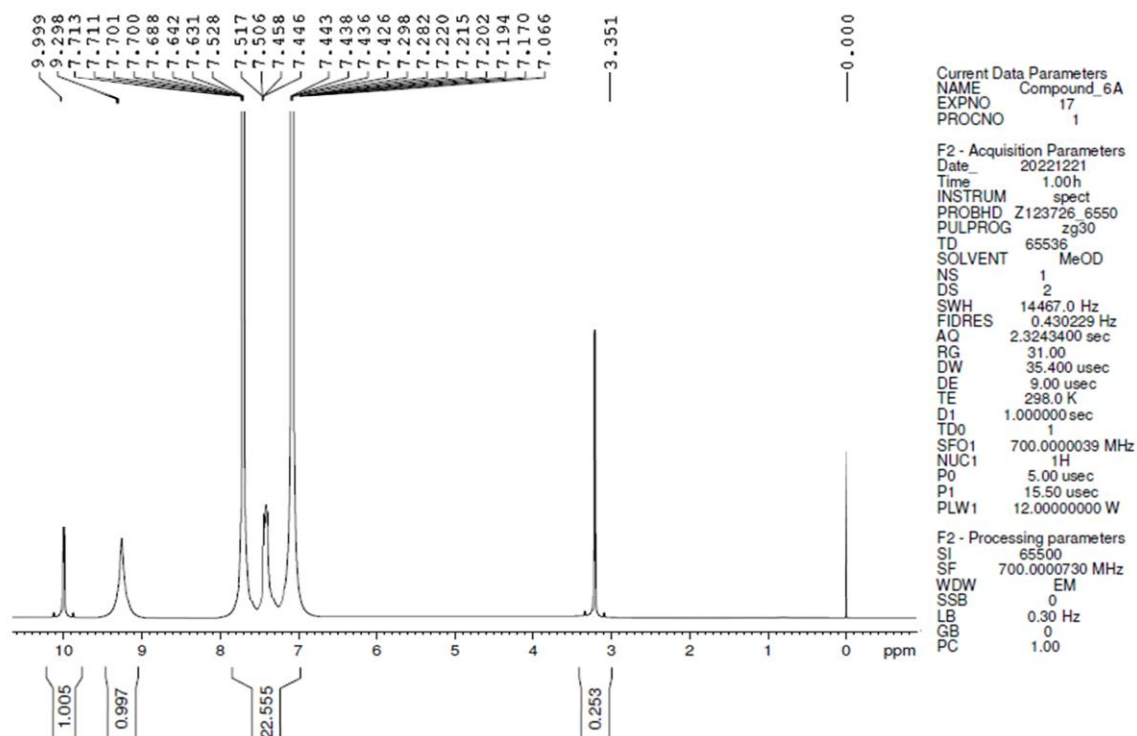

Figure S6. <sup>1</sup>H-NMR spectrum of compound 6a

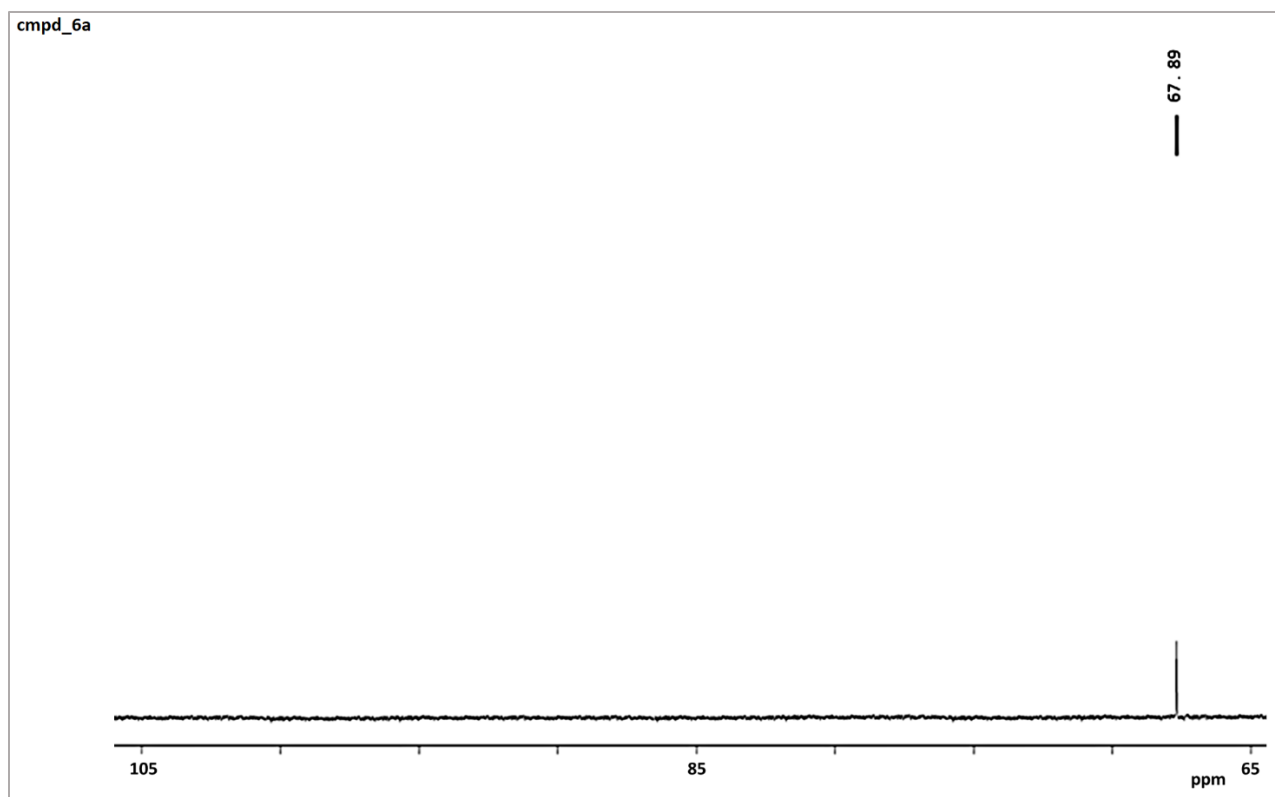

Figure S7a. 13C-NMR spectrum of compound 6a

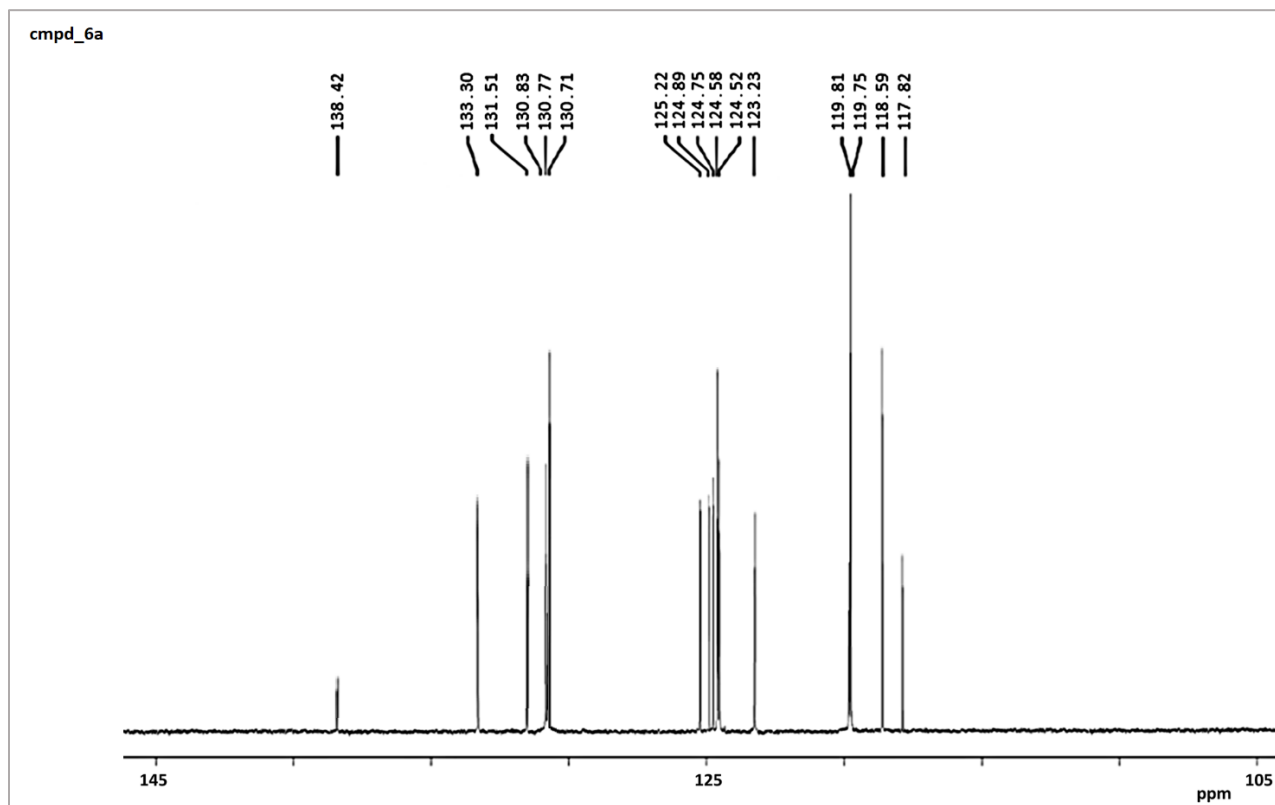

Figure S7b. 13C-NMR spectrum of compound 6a

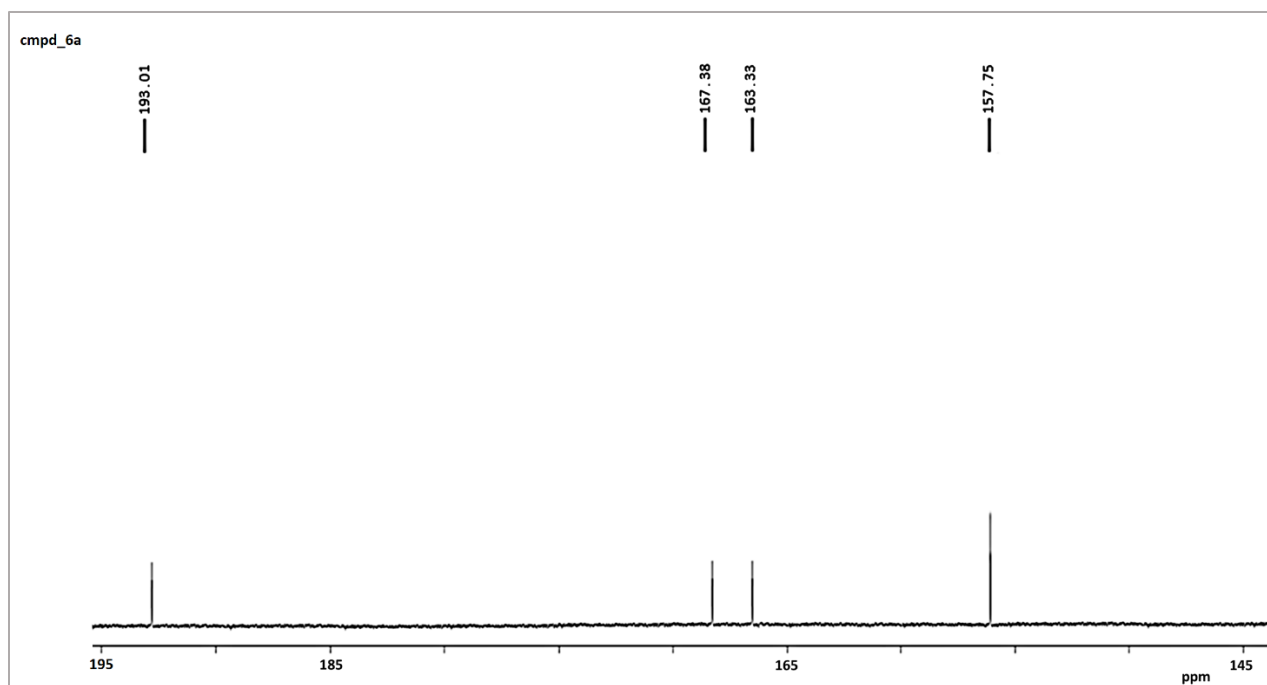

Figure S7c. 13C-NMR spectrum of compound 6a

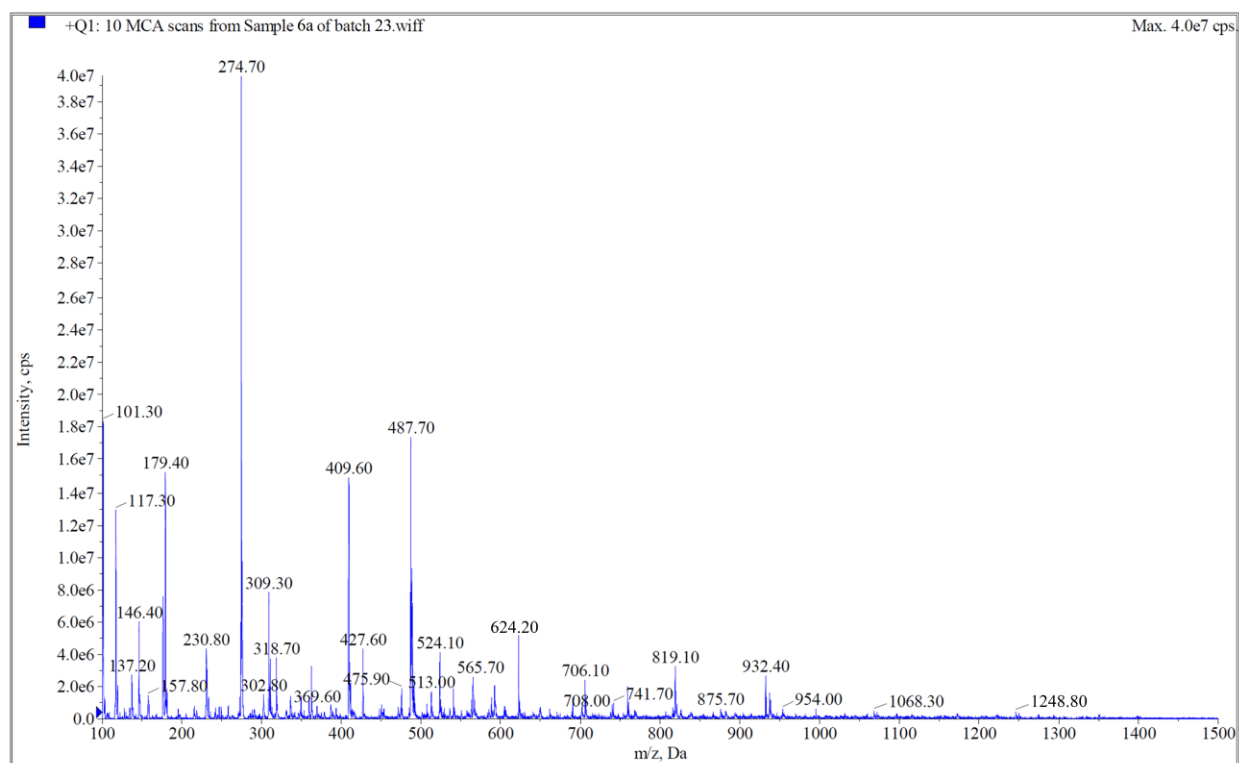

Figure S8. MASS spectrum of compound 6a
